# Supplementary material
Source: HighWire-hosted journal article supplement (https://www.cmajopen.ca/highwire/filestream/81397/field_highwire_adjunct_files/1/2019-0076-original-submission.pdf)
Supplement: 2019-0076-original-submission.pdf [file 2019-0076-original-submission.pdf]

1  
2  
3  
4  
5  
6  
7  
8 **A CROSS-SECTIONAL ANALYSIS OF LUMBAR SPINE CT REFERRAL RATES BY**  
9  
10 **FAMILY PHYSICIANS USING ROUTINELY COLLECTED DATA IN ONE HEALTH**  
11  
12 **REGION IN NEWFOUNDLAND AND LABRADOR, CANADA: A BRIEF REPORT**  
13  
14  
15  
16

17 Authors: Gabrielle S Logan MSc\*<sup>1</sup>, Bethan Copsey PhD(c)<sup>2</sup>, Holly Etchegary PhD<sup>1</sup>, Patrick  
18 Parfrey MD<sup>1</sup>, Krista Mahoney PhD<sup>1</sup>, Amanda Hall PhD<sup>1,3</sup>  
19  
20  
21  
22  
23  
24

25 Affiliations: (1) Faculty of Medicine, Memorial University of Newfoundland, St. John's, NL,  
26 Canada; (2) Centre for Statistics in Medicine, Nuffield Department of Orthopaedics,  
27 Rheumatology and Musculoskeletal Sciences, University of Oxford, Oxford, UK (3) Primary  
28 Health Research Unit, Memorial University of Newfoundland, St. John's, NL, Canada.  
29  
30  
31  
32  
33  
34  
35  
36  
37  
38

39 \*Corresponding author: Gabrielle S Logan; Address: 300 Prince Philip Dr, St. John's,  
40 Newfoundland and Labrador, Canada, A1B 3V6; email: [glogan@mun.ca](mailto:glogan@mun.ca) (Orcid ID:  
41  
42 <https://orcid.org/0000-0001-7007-9373>)  
43  
44  
45  
46  
47  
48  
49  
50  
51  
52  
53  
54  
55  
56  
57  
58  
59  
60

## INTRODUCTION

Choosing Wisely recommends reducing unnecessary lumbar spine imaging for low back pain, primarily to improve patient safety by avoiding unnecessary exposure to carcinogenic ionising radiation and secondarily to reduce healthcare spending associated with over testing (1,2). However, only a handful of studies have examined population based utilisation of lumbar spine computed tomography (CT) examinations, with most studies reporting the proportion of patients with low back pain who receive CT imaging compared to those who do not (3,4). Australia and the US provide population level data on lumbar spine CT utilisation for their countries, which is helpful for comparisons of usage internationally (5,6). These estimates range from 209 CTs /100,000 to 2,464/100,000 individuals (5,6). In Canada, this type of data is challenging to find. The only data available were provided in a government commissioned report on appropriate imaging and it focused on the lumbar spine CT rates in just two Canadian provinces, Manitoba and Ontario, and found different estimates in both provinces (7).

The objective of this study is to determine the yearly age-sex standardised rates of lumbar spine CT imaging for adults ( $\geq 20$  years old) by family physicians in the Eastern Health Region of Newfoundland and Labrador (NL), Canada. This study focused on CT imaging largely in response to a report by the Canadian institute for Health information (CIHI) which reported Newfoundland and Labrador's all type CT imaging rate to be to twice as high as the national average and the second highest rate of all the provinces (8). This study adds to the body of work in this area by presenting lumbar spine CT rates from a 3<sup>rd</sup> province in Canada. It has been estimated that NL has higher use of CTs (any-type) than any other Canadian province (8). While we could hypothesize that the rate of lumbar spine CTs may also be higher in NL than other

1  
2  
3 provinces, comparisons between provinces are beyond the scope of this study due to lack of data  
4  
5 access required for this analysis.  
6  
7

## 8 **METHODS**

9

10 **Setting and Study Period.** This study was conducted in the Eastern Health Region of  
11  
12 Newfoundland and Labrador. It is the largest health region in the province, providing health care  
13  
14 to approximately 300,000 people, or 60% of the province population. The years of this study  
15  
16 (2013-2016) period were chosen, because they were years with data that were fully available,  
17  
18 considered reliable, and were recent. Older data was unreliable due to a change in a data  
19  
20 management system. No policy changes or educational campaigns to reduce imaging had  
21  
22 occurred.  
23  
24  
25  
26

27 **Data Source.** The third-party data custodian, the Newfoundland and Labrador Centre for Health  
28  
29 Information (NLCHI), identified the dataset from the administrative codes for lumbar spine CTs  
30  
31 with and without contrast from Meditech, an electronic medical records database in the Eastern  
32  
33 Health Region of NL. Records from 2013 to 2016 were accessed and the following variables  
34  
35 were collected: number of lumbar spine CTs with or without contrast, age, sex, ordering  
36  
37 physician specialty, and imaging service date. Only select hospitals perform CT examinations,  
38  
39 therefore we believe that this dataset is comprehensive and accurate, encompassing all CT  
40  
41 examinations that were performed with or without contrast in Eastern Health. While it is possible  
42  
43 there may be some overlap with the thoracic spine, it is unlikely due to the different codes that  
44  
45 are used for such examinations. Repeated, cancelled, and missed CT examinations may have  
46  
47 occurred in the dataset, which are not possible to distinguish from a completed exam and may  
48  
49 overestimate the CT rates.  
50  
51  
52  
53  
54  
55  
56  
57  
58  
59  
60

1  
2  
3 **Data Cleaning.** The dataset contained all lumbar spine CT examinations conducted between  
4  
5 January 1<sup>st</sup>, 2013 and December 31<sup>st</sup>, 2016. The inclusion criteria were adults ( $\geq 20$  years old)  
6  
7 who received a CT scan, and referrals that were ordered from a family physician (FP; any  
8  
9 specialty other than family medicine or general practitioner was excluded). Data that did not fit  
10  
11 the inclusion criteria were removed. The paediatric population ( $< 18$ ) was removed because  
12  
13 different diagnostic imaging guidelines apply to children. The 18- and 19-year olds were  
14  
15 considered to be part of the paediatric group (group range was 15 to 19) and would thus not  
16  
17 appear in our dataset. Therefore, we excluded the small number of patients ( $n=98$ ) aged 18- and  
18  
19 19- years old in our adult dataset since including them would underestimate the number of  
20  
21 images occurring in this age group, inaccurately influencing our rate estimation. Only family  
22  
23 physicians were included because in our local context the first point of contact for a patient with  
24  
25 low back pain (LBP) typically is the patient's FP. As such, we focused only on this group of  
26  
27 providers and this decision was made *a priori*. Finally, yearly totals of lumbar spine CT imaging  
28  
29 were obtained.  
30  
31  
32  
33  
34  
35

36 **Data Analysis.** Crude rates of lumbar spine CT referrals were calculated by dividing the total  
37  
38 number of CTs performed in Eastern Health Region in each year of interest (numerator) by the  
39  
40 total population of Eastern Health Region in that same year of interest (denominator) and  
41  
42 multiplying that proportion by 100,000 people. Population estimates were provided by NLCHI.  
43  
44 The rate from 2016 used 2015 Eastern Health Region population estimates, as the population  
45  
46 estimates for 2016 were not available.  
47  
48  
49

50  
51 Age-sex standardised rates of lumbar spine CTs were calculated by categorising all  
52  
53 records of CT referrals into appropriate age groups and sex of the patient for each year of  
54  
55 interest. Each age group contained 5 different ages (e.g., 20 to 24). Each year of interest's CT  
56  
57  
58  
59  
60

1  
2  
3 rate for the applicable age-sex categories was determined by dividing CT count for age-sex  
4 category by the population estimate for that same age-sex category and multiplying the  
5 proportion by 100,000.  
6  
7  
8  
9

10 CT counts for 2014, 2015, and 2016 were estimated using 2013 population age-sex  
11 estimates. For example, this was calculated for 2014 by taking the 2014 rate for each age-sex  
12 category and dividing it by 100,000 to get the proportion, and multiplying the proportion by the  
13 2013 population estimate. Then we summed the estimated CT counts for each year of interest.  
14  
15 The total estimate of CT counts for each year was used to calculate the age-sex adjusted rate by  
16 taking the CT count estimate for each year of interest, dividing it by the 2013 population  
17 estimate and multiplying it by 100,000.  
18  
19  
20  
21  
22  
23  
24  
25  
26

27 To compare whether or not rates of CT referrals per 100,000 people in a 1-year period  
28 were increasing over time, rate ratios and 95% confidence intervals were calculated. Each year's  
29 age-sex standardised lumbar spine CT rate was compared to the previous year's rate to see if  
30 there was a statistically significant change. Confidence intervals (CI) were calculated, and if  
31 either the upper or lower CI crossed one, this indicated that the rates were not significantly  
32 different.  
33  
34  
35  
36  
37  
38  
39  
40  
41

42 This study was exempt from ethical approval from the local Health Research Ethics Boards as it  
43 is a secondary analysis of anonymised data and is a part of a provincial quality improvement  
44 strategy (9).  
45  
46  
47  
48

## 49 RESULTS

50  
51 There was a total of 18,358 lumbar spine CTs performed in the Eastern Health Region  
52 between 2013 and 2016. 3,987 records were excluded due to non-FP healthcare provider (n=  
53  
54  
55  
56  
57  
58  
59  
60

1  
2  
3 2,831; specialists e.g., neurologists, orthopaedic surgeons), patient age (n=98), or insufficient  
4 information (n=1,058) resulting in 14,371 included records. 54.2% of the included CT  
5 examination referrals were for females, with the average age being 54.1 years old (standard  
6 deviation 14 years). Table 1 presents the numbers of included records stratified by age and sex in  
7 the age categories determined by NLCHI. The raw numbers of lumbar spine CTs performed in  
8 the Eastern Health Region are as follows: 3,118 in 2013, 3,581 in 2014, 4,042 in 2015, and 3,629  
9 in 2016.

10  
11  
12  
13  
14  
15  
16  
17  
18  
19  
20 The age-sex standardised rates were similar to the crude rate and are as follows:  
21 1,225/100,000 in 2013, 1,393/100,000 in 2014, 1,556/100,000 in 2015, and 1,395/100,000 in  
22 2016. Crude rates of CT referrals per 100,000 were as follows: 1,225/100,000 in 2013,  
23 1,399/100,000 in 2014, 1,568/100,000 in 2015, and 1,408/100,000 in 2016. The rate ratios  
24 comparing a year to an adjacent year are presented in Table 2. The greatest increase in rates was  
25 between 2014 and 2013, and there was a decrease in rates between 2016 and 2015.

## 26 27 28 29 30 31 32 33 34 **DISCUSSION**

35  
36  
37 The age-sex standardised lumbar spine CT rate ranged from 1,253 to 1,556/100,000  
38 individuals over four years. While our rate ratio analysis identified that the observed differences  
39 in rates were statistically different, the magnitude of these differences were so small they are  
40 likely clinically irrelevant, meaning that the differences in lumbar spine CT numbers for each  
41 year is most likely due to the large sample size and not representative of actual changes in CT  
42 ordering rates from FPs. Thus, the lumbar spine CT rate in NL has remained steady from 2013-  
43 2016. Diagnostic imaging data from a larger timeframe would allow for an accurate trend  
44 analysis.

1  
2  
3 To put our findings in context with the other populations, we found data from Canada,  
4  
5 Australia, and USA (5-7). Busse et al. published grey-literature rates and found that in Manitoba,  
6  
7 Canada, in 2010/11, the age-sex standardised rate of lumbar spine CTs ordered was 967 all axial  
8  
9 CTs per 100,000 individuals (all physician included), and in Ontario, Canada, the age-sex  
10  
11 standardised rate was approximately 600 all axial CTs per 100,000 persons (all physicians  
12  
13 included) (7). However, direct comparisons are difficult, as the reference population in our NL  
14  
15 context used NL specific age-sex standardised population estimates in the analysis techniques  
16  
17 and Busse et al. did not use the same reference populations. It is also noteworthy that family  
18  
19 physicians were the target provider for the NL age-sex standardised rates, thus all other providers  
20  
21 were excluded; This was not the case for Busse et al. Busse et al. also collected data from a years  
22  
23 much more historic than ours, thus there may be changes that have occurred that make  
24  
25 comparison challenging.  
26  
27  
28  
29

30  
31 In Australia, we found age-standardised rates only, which varied from 209/100,000 to  
32  
33 2,464/100,000 individuals (6). In the USA, there were also different rates of spinal imaging  
34  
35 (MRI and CT) from different hospital referral regions, which ranged from 320/100,000 to  
36  
37 2,370/100,000 individuals (age, sex, and race standardised) (5). Caution needs to be taken when  
38  
39 comparing NL CT utilisation rates to other countries. While numerically our rates are within the  
40  
41 range of these other countries, differing population estimates for the reference populations and  
42  
43 inclusion of MRI in the USA rates limits direct comparison.  
44  
45  
46  
47

48 It is important to note the limitations in our dataset. First, the age-sex standardised rate  
49  
50 for 2016 was based on population estimates from 2015. Given that the number of people in the  
51  
52 Eastern Health Region may have changed from 2015 to 2016, the accuracy of the 2016 estimate  
53  
54 may not be as robust compared to estimates with accurate data. Second, the data used for  
55  
56  
57  
58  
59  
60

1  
2  
3 analysis was routinely collected health data not collected with research purposes in mind. We  
4 cannot know if there was misclassified or missing data, if the quality and accuracy of the data  
5 was considered, or if there were other unforeseen confounders (e.g., seasonal effects, local  
6 hospital policy change, rural patients travelling to Eastern Health for care) (10). There was no  
7 known policy change in the included years, however, there may have been local changes that  
8 decreased the number of imaging in 2016. Third, repeat imaging examinations of the same  
9 individual may have occurred in any of the included years, which may have an impact on the  
10 imaging rate. Records that were missing patient age and specialist information were also  
11 excluded, which may result in an underestimation of the true rate of CT imaging. Finally,  
12 specialist physicians were excluded from this analysis; the inclusion of these physician  
13 specialties would only increase the age-sex standardised rates of lumbar spine CTs. Finally, there  
14 was missing data that was excluded from analysis, which has the possibility of underestimating  
15 the true lumbar spine CT rates.

16  
17  
18  
19  
20  
21  
22  
23  
24  
25  
26  
27  
28  
29  
30  
31  
32  
33  
34 In conclusion, there appears to be a high rate of lumbar spine CTs ordered in the Eastern  
35 Health Region of NL and this seems similar or possibly even higher than other larger Canadian  
36 provinces. While direct or indirect comparisons were beyond the scope of this paper, future  
37 research could look more closely at comparisons of lumbar spine CT utilization rates amongst  
38 provinces, especially given the high prevalence of LBP, the potential harm to a patient from  
39 radiation, and the questionable clinical utility for patients with uncomplicated LBP who require  
40 only conservative care. Similarly, further research is needed to better understand how many CTs  
41 were necessary for the management of a patient's condition. It is important to focus research on  
42 health system targeted interventions to improve the appropriateness of CT referrals, which would  
43 ensure patient safety is prioritized and healthcare funding is spent appropriately.



**REFERENCES**

1. Chou R, Deyo RA, Jarvik JG. Appropriate use of lumbar imaging for evaluation of low back pain. *Radiol Clin North Am.* 2012;50(4):569–85.
2. Choosing Wisely Canada. Imaging Tests for Lower Back Pain: When you need them and when you don't [Internet]. Available from: <https://choosingwiselycanada.org/imaging-tests-low-back-pain/>
3. Mafi JN, McCarthy EP, Davis RB, Landon BE. Worsening trends in the management and treatment of back pain. *JAMA Intern Med.* 2013;173(17):1573–81.
4. Eccles M, Steen N, Grimshaw J, Thomas L, McNamee P, Soutter J, et al. Effect of audit and feedback, and reminder messages on primary-care radiology referrals: a randomised trial. *The Lancet.* 2001;357(9266):1406–9.
5. Lurie JD, Birkmeyer NJ, Weinstein JN. Rates of advanced spinal imaging and spine surgery. *Spine.* 2003;28(6):616–20.
6. Australian Commission on Safety and Quality in Health Care. Computed tomography of the lumbar spine [Internet]. 2015. Available from: [https://www.safetyandquality.gov.au/wp-content/uploads/2015/11/SAQ201\\_03\\_Chapter2\\_v9\\_FILM\\_tagged\\_merged\\_2-3.pdf](https://www.safetyandquality.gov.au/wp-content/uploads/2015/11/SAQ201_03_Chapter2_v9_FILM_tagged_merged_2-3.pdf)
7. Busse J, Alexander P, Abdul-Razzak A, Riva J, Alabousi M, Dufton J. Appropriateness of spinal imaging use in Canada. *Hamilt McMaster Univ.* 2013;(Journal Article).
8. Medical Imaging in Canada, 2012 | CIHI [Internet]. 2017 [cited 2019 Sep 12]. Available from: <https://www.cihi.ca/en/medical-imaging-in-canada-2012>
9. Newfoundland and Labrador Health Research Ethics Authority. Health Research Ethics Authority Ethics Review Required? [Internet]. [cited 2019 Sep 12]. Available from: <https://www.hrea.ca/how-to-apply/ethics-review-required/>
10. Benchimol EI, Smeeth L, Guttman A, Harron K, Moher D, Petersen I, et al. The REporting of studies Conducted using Observational Routinely-collected health Data (RECORD) Statement. *PLOS Med.* 2015 Oct 6;12(10):e1001885.

Table 1. Included patient demographics stratified by age category and sex

| <b>Age Groups</b>  | <b>Number of Records</b> |
|--------------------|--------------------------|
| <b>Female</b>      | <b>7795</b>              |
| Age 20 to 24       | 132                      |
| Age 25 to 29       | 249                      |
| Age 30 to 34       | 356                      |
| Age 35 to 39       | 497                      |
| Age 40 to 44       | 718                      |
| Age 45 to 49       | 863                      |
| Age 50 to 54       | 1051                     |
| Age 55 to 59       | 1020                     |
| Age 60 to 64       | 966                      |
| Age 65 to 69       | 850                      |
| Age 70 to 74       | 525                      |
| Age 75 to 79       | 314                      |
| Age 80 to 84       | 168                      |
| Age 85 plus        | 86                       |
| <b>Male</b>        | <b>6575</b>              |
| Age 20 to 24       | 119                      |
| Age 25 to 29       | 209                      |
| Age 30 to 34       | 338                      |
| Age 35 to 39       | 414                      |
| Age 40 to 44       | 577                      |
| Age 45 to 49       | 742                      |
| Age 50 to 54       | 869                      |
| Age 55 to 59       | 918                      |
| Age 60 to 64       | 880                      |
| Age 65 to 69       | 636                      |
| Age 70 to 74       | 457                      |
| Age 75 to 79       | 237                      |
| Age 80 to 84       | 128                      |
| Age 85 plus        | 51                       |
| <b>Grand Total</b> | <b>14370</b>             |

1  
2  
3  
4  
5  
6  
7  
8  
9  
10  
11  
12  
13  
14  
15  
16  
17  
18  
19  
20  
21  
22  
23  
24  
25  
26  
27  
28  
29  
30  
31  
32  
33  
34  
35  
36  
37  
38  
39  
40  
41  
42  
43  
44  
45  
46  
47  
48  
49  
50  
51  
52  
53  
54  
55  
56  
57  
58  
59  
60

Table 2. Rate ratios comparing age-sex standardised rate estimates in adjacent years

| Year comparison | Rate Ratio* (95% confidence interval) |
|-----------------|---------------------------------------|
| 2014 to 2013    | 1.137 (95% CI 1.084, 1.194)           |
| 2015 to 2014    | 1.117 (95% CI 1.067, 1.169)           |
| 2016 to 2015    | 0.896 (95% CI 0.857, 0.938)           |

\*Calculated by dividing the more recent year by the year previous.

Confidential
